# Supplementary material
Source: Springer Nature journal article supplement (https://www.springermedizin.de/resource/supplementary/12891_2013_1938_MOESM1_ESM.pdf/9508846)

Sex Males:Female

Age 85:65

Charlsons Medium:Low

Charlsons High:Low

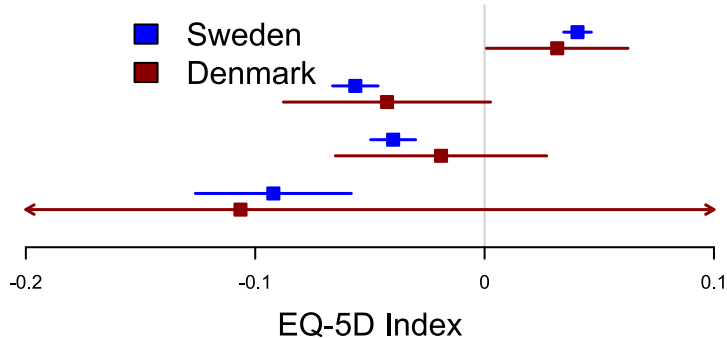

Supplement: MOESM1 [file 9508846]
